# Supplementary material for: Caudal–Rostral Progression of Alpha Motoneuron Degeneration in the SOD1G93A Mouse Model of Amyotrophic Lateral Sclerosis
Source: MDPI journal article supplement (doi:10.3390/antiox11050983), 2022-05-17
Supplement: s1 [file s1]

**Table S1.** Size comparison of  $\alpha$ -MNs and  $\gamma$ -MNs between SOD1<sup>G93A</sup> and WT mice:.

| Group                                                                 | Statistical test                                   | N                                                                                                     | P Values                                                                |
|-----------------------------------------------------------------------|----------------------------------------------------|-------------------------------------------------------------------------------------------------------|-------------------------------------------------------------------------|
| SOD1 <sup>G93A</sup> v WT<br>( $\alpha$ -MNs v $\gamma$ -MNs)         | Two-Way ANOVA,<br>Tukey's multiple comparison test | SOD1 <sup>G93A</sup> : $\alpha$ -MNs (4) $\gamma$ -MNs (4)<br>WT: $\alpha$ -MNs (4) $\gamma$ -MNs (4) | Genotype: 0.0015 MN<br>classification:<br><0.001<br>Interaction: 0.0087 |
| Distribution analysis:<br>$\alpha$ -MNs: SOD1 <sup>G93A</sup> v<br>WT | Mann Whitney U Test.                               | SOD1 <sup>G93A</sup> +: $\alpha$ -MNs (60)<br>WT: $\alpha$ -MNs (60)                                  | P <0.001 (Two tailed)                                                   |
| Distribution analysis:<br>$\gamma$ -MNs: SOD1 <sup>G93A</sup> v<br>WT | Mann Whitney U Test.                               | SOD1 <sup>G93A</sup> : $\gamma$ -MNs (4)<br>WT: $\gamma$ -MNs (4)                                     | P <0.001 (Two tailed)                                                   |
| Distribution analysis:<br>$\alpha$ p-MNs v WT $\alpha$ -MNs           | Mann Whitney U Test.                               | $\alpha$ p-MNs (22)<br>WT: $\alpha$ -MNs (38)                                                         | P 0.912 (Two tailed)                                                    |

**Table S2.** MNs loss in between 3- and 4- months in SOD1<sup>G93A</sup> and WT mice: (\* Indicates significance.).

| Group                                                                                             | Statistical test                                      | N                                                                                          | P Values                                                   |
|---------------------------------------------------------------------------------------------------|-------------------------------------------------------|--------------------------------------------------------------------------------------------|------------------------------------------------------------|
| <b><math>\alpha</math>-MNs Lumbar</b><br>SOD1 <sup>G93A</sup> v WT<br>(3-Months v 4-Months)       | Two-Way ANOVA,<br>Tukey's multiple<br>comparison test | 3- Month: WT (5), SOD1 <sup>G93A</sup> (3),<br>4- Month: WT (3), SOD1 <sup>G93A</sup> (5). | *Genotype: 0.0009<br>Age: 0.8368<br>Interaction: 0.8929    |
| <b><math>\gamma</math>-MNs Lumbar</b><br>SOD1 <sup>G93A</sup> v WT<br>(3-Months v 4-Months)       | Two-Way ANOVA,<br>Tukey's multiple<br>comparison test | 3- Month: WT (5), SOD1 <sup>G93A</sup> (3),<br>4- Month: WT (3), SOD1 <sup>G93A</sup> (5). | Genotype: 0.508<br>Age: 0.705<br>Interaction: 0.07         |
| <b><math>\alpha</math>-MNs Cervical</b><br>SOD1 <sup>G93A</sup> v WT<br>(3-Months v 4-Months)     | Two-Way ANOVA,<br>Tukey's multiple<br>comparison test | 3- Month: WT (5), SOD1 <sup>G93A</sup> (3),<br>4- Month: WT (3), SOD1 <sup>G93A</sup> (5). | *Genotype: 0.0002<br>Age: 0.2472<br>Interaction: 0.6382    |
| <b><math>\gamma</math>-MNs Cervical</b><br>SOD1 <sup>G93A</sup> v WT<br>(3-Months v 4-Months)     | Two-Way ANOVA,<br>Tukey's multiple<br>comparison test | 3- Month: WT (5), SOD1 <sup>G93A</sup> (3),<br>4- Month: WT (3), SOD1 <sup>G93A</sup> (5). | Genotype: 0.9457<br>Age: 0.5898<br>Interaction: 0.7307     |
| <b>WT <math>\alpha</math>-MNs</b><br>Lumbar v Cervical (3-Months v 4-<br>Months)                  | Two-Way ANOVA,<br>Tukey's multiple<br>comparison test | 3- Month: Lumbar (5), Cervical<br>(5),<br>4- Month: Lumbar (3), Cervical<br>(3).           | Spinal level: 0.2139<br>Age: 0.3193<br>Interaction: 0.9633 |
| <b>SOD1<sup>G93A</sup> <math>\alpha</math>-MNs</b><br>Lumbar v Cervical (3-Months v 4-<br>Months) | Two-Way ANOVA,<br>Tukey's multiple<br>comparison test | 3- Month: Lumbar (5), Cervical<br>(5),<br>4- Month: Lumbar (3), Cervical<br>(3).           | *Spinal level: 0.002<br>Age: 0.205<br>*Interaction: 0.0415 |
| <b>WT <math>\gamma</math>-MNs</b><br>Lumbar v Cervical (3-Months v 4-<br>Months)                  | Two-Way ANOVA,<br>Tukey's multiple<br>comparison test | 3- Month: Lumbar (5), Cervical<br>(5),<br>4- Month: Lumbar (3), Cervical<br>(3).           | Spinal level: 0.0022<br>Age: 0.9420<br>Interaction: 0.2664 |
| <b>SOD1<sup>G93A</sup> <math>\gamma</math>-MNs</b><br>Lumbar v Cervical (3-Months v 4-<br>Months) | Two-Way ANOVA,<br>Tukey's multiple<br>comparison test | 3- Month: Lumbar (5), Cervical<br>(5),<br>4- Month: Lumbar (3), Cervical<br>(3).           | Spinal level: 0.2764<br>Age: 0.4078<br>Interaction: 0.2807 |

**Table S3.**  $\alpha$ -MNs counts in the phrenic nucleus between 3 and 4 months.

| Group                                          | Statistical test                 | N                                           | P Values            |
|------------------------------------------------|----------------------------------|---------------------------------------------|---------------------|
| <b><math>\alpha</math>-MNs Phrenic nucleus</b> |                                  |                                             |                     |
| SOD1 <sup>G93A</sup> v WT                      | Two-Way ANOVA,                   | 3- Month: WT (5), SOD1 <sup>G93A</sup> (3). | *Genotype: 0.001    |
| 3-Months v 4-Months                            | Tukey's multiple comparison test | 4- Month: WT (3), SOD1 <sup>G93A</sup> (5). | Age: 0.0312         |
|                                                |                                  |                                             | Interaction: 0.8269 |

**Table S4.** PKC- $\gamma$  intensity between 3 and 4 months in SOD1 and WT mice:.

| Group                     | Statistical test                 | N                                          | P Values            |
|---------------------------|----------------------------------|--------------------------------------------|---------------------|
| <b>Lumbar</b>             |                                  |                                            |                     |
| SOD1 <sup>G93A</sup> v WT | Two-Way ANOVA,                   | 3-Month: WT (5), SOD1 <sup>G93A</sup> (4), | Genotype: 0.0521    |
| (3-Months v 4-Months)     | Tukey's multiple comparison test | 4-Month: WT (3), SOD1 <sup>G93A</sup> (3). | Age: 0.0786         |
|                           |                                  |                                            | Interaction: 0.6485 |
| <b>Cervical</b>           |                                  |                                            |                     |
| SOD1 <sup>G93A</sup> v WT | Two-Way ANOVA,                   | 3-Month: WT (5), SOD1 <sup>G93A</sup> (3), | Genotype: 0.3866    |
| (3-Months v 4-Months)     | Tukey's multiple comparison test | 4-Month: WT (3), SOD1 <sup>G93A</sup> (3). | Age: 0.7955         |
|                           |                                  |                                            | Interaction: 0.4244 |
